# Supplementary material for: Tunable scattered colors over a wide spectrum from a single nanoparticle
Source: Royal Society of Chemistry journal article supplement (doi:10.1039/c3nr02718j), 2013-01-01
Supplement: c3nr02718j.pdf [file c3nr02718j.pdf]

## Supporting information

### Tunable scattered colors over a wide spectrum from a single nanoparticle

Youju Huang, Ferhan Abdul Rahim and Dong-Hwan Kim\*

School of Chemical and Biomedical Engineering, Nanyang Technological University, 637457,

Singapore

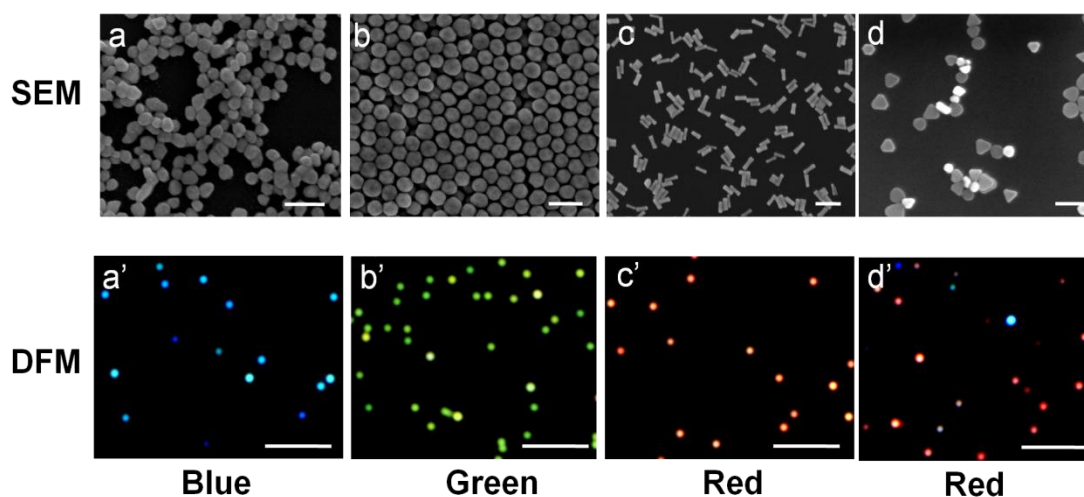

**S-Figure 1.** Scanning electron microscopic and dark field microscopic images of silver nanospheres (a and a'), gold nanospheres (b and b'), gold nanorods (c and c') and silver nanoplates (d and d'; the blue spots in d' are attributed to non-plate particles). The scale bars in a-d and a'-d' represent 100 nm and 5  $\mu$ m, respectively.

\* Corresponding author: e-mail: dhkim@ntu.edu.sg; Tel: 65-67904111; Fax: 65-67911761 (DH. Kim)

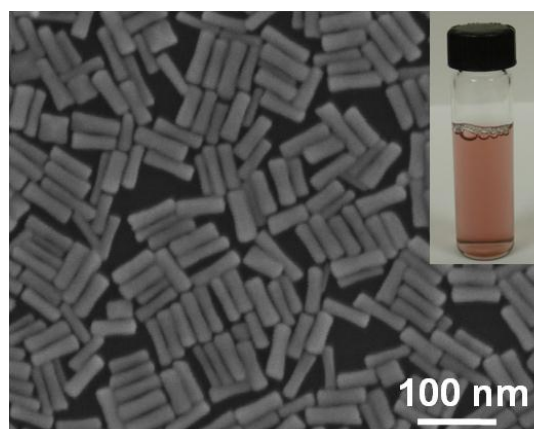

**S-Figure 2.** SEM image of AuNRs used as seeds for the growth of Au-Ag core-shell NRs.

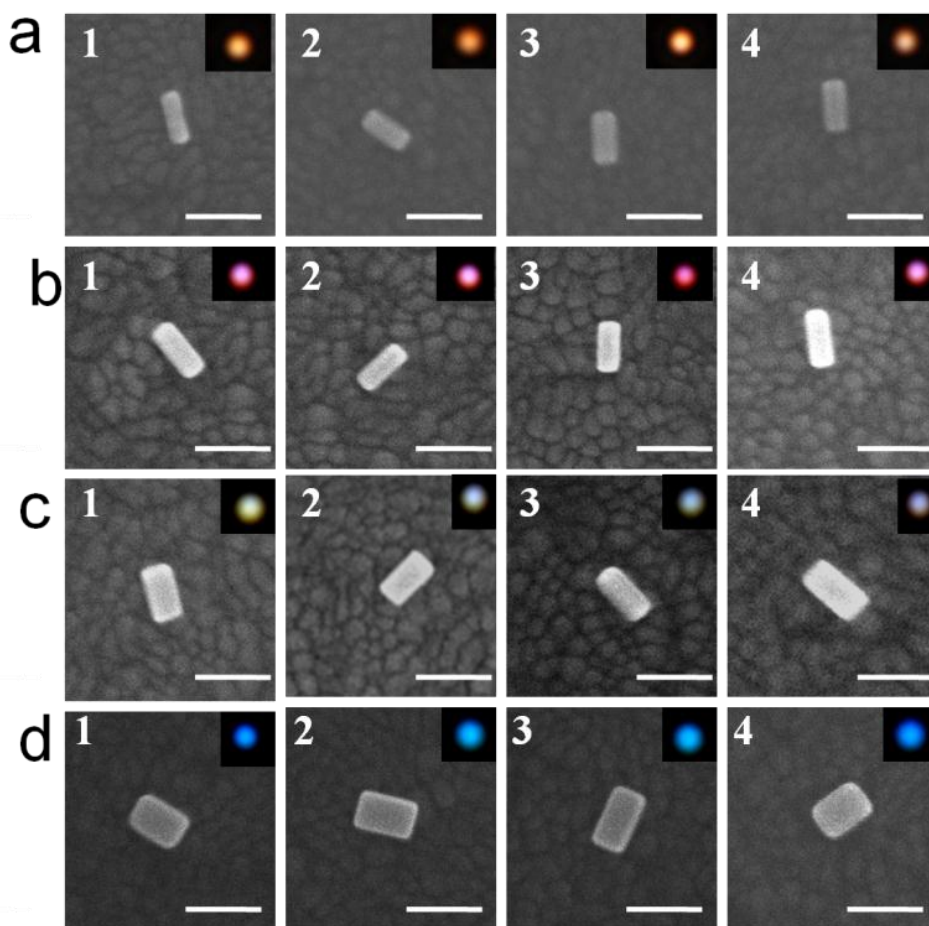

**S-Figure 3.** SEM images of single Au-Ag core-shell NRs with various thicknesses of silver shell (a: 2 nm; b: 5 nm; c: 10 nm; d: 20 nm) on ITO glasses and their corresponding scattered optical images (insets). The scale bar represents 100 nm.
